# Supplementary material for: Synthesis and characterization of elastic star shape-memory polymers as self-expandable drug-eluting stents
Source: Royal Society of Chemistry journal article supplement (doi:10.1039/c2jm15918j), 2012-01-01
Supplement: c2jm15918j.pdf [file c2jm15918j.pdf]

## Electronic Supplementary Information

# Synthesis and Characterization of Elastic Star Shape- Memory Polymers as Self-Expandable Drug-Eluting Stent

*Liang Xue, Shiyao Dai, and Zhi Li\**

Department of Chemical and Biomolecular Engineering, National University of Singapore,

4 Engineering Drive 4, Singapore 117576

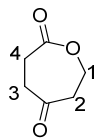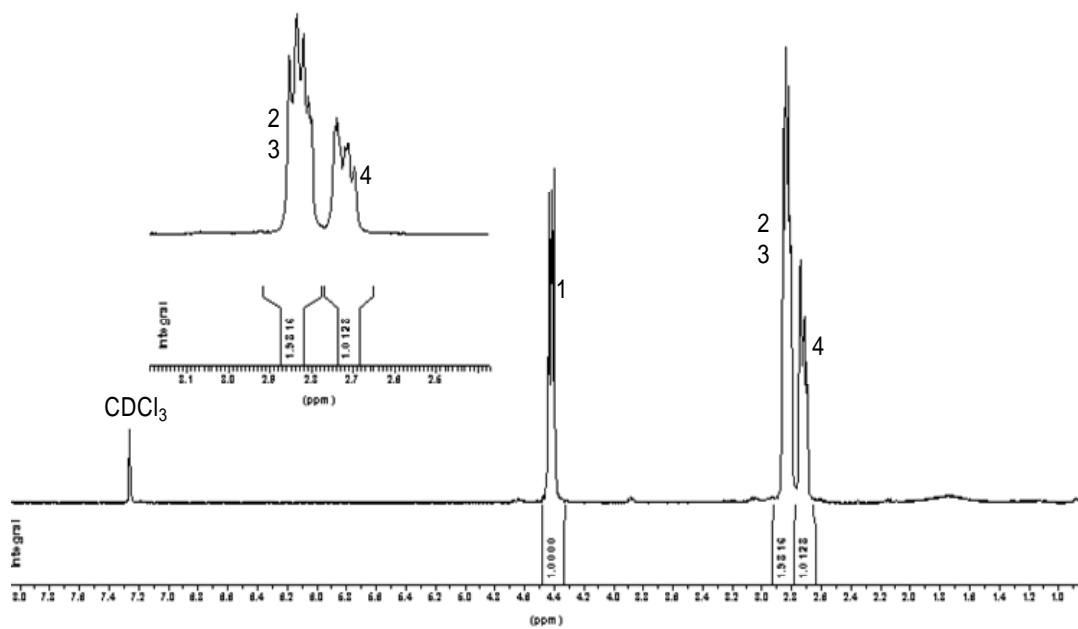

Figure S1.  $^1\text{H}$  NMR spectrum of OPD in  $\text{CDCl}_3$  at 298K.

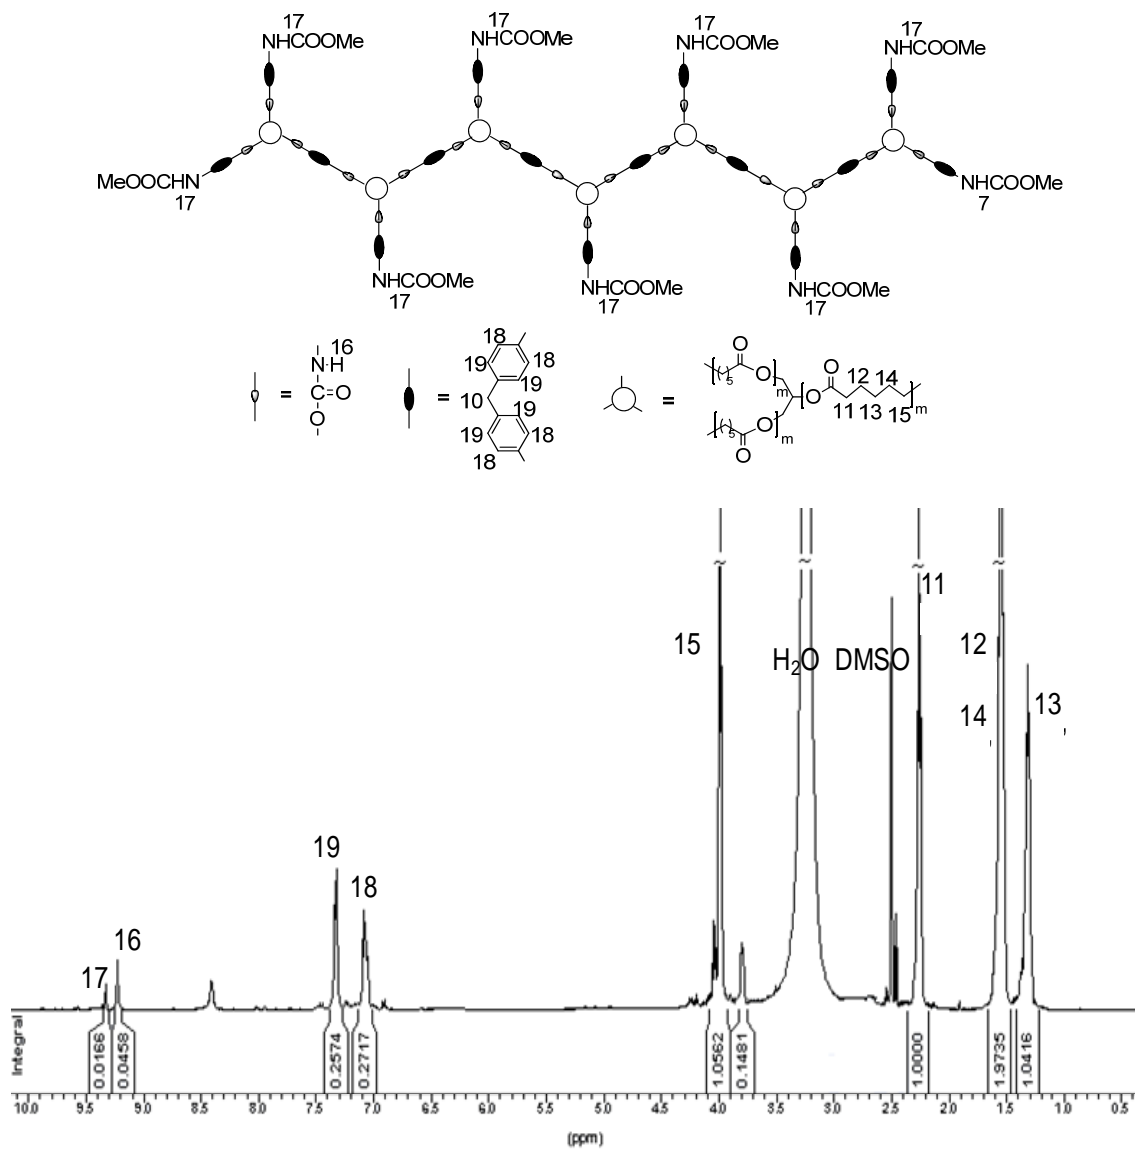

Figure S2. <sup>1</sup>H NMR spectrum of HPCLI in DMSO-*d*<sub>6</sub> at 333 K.

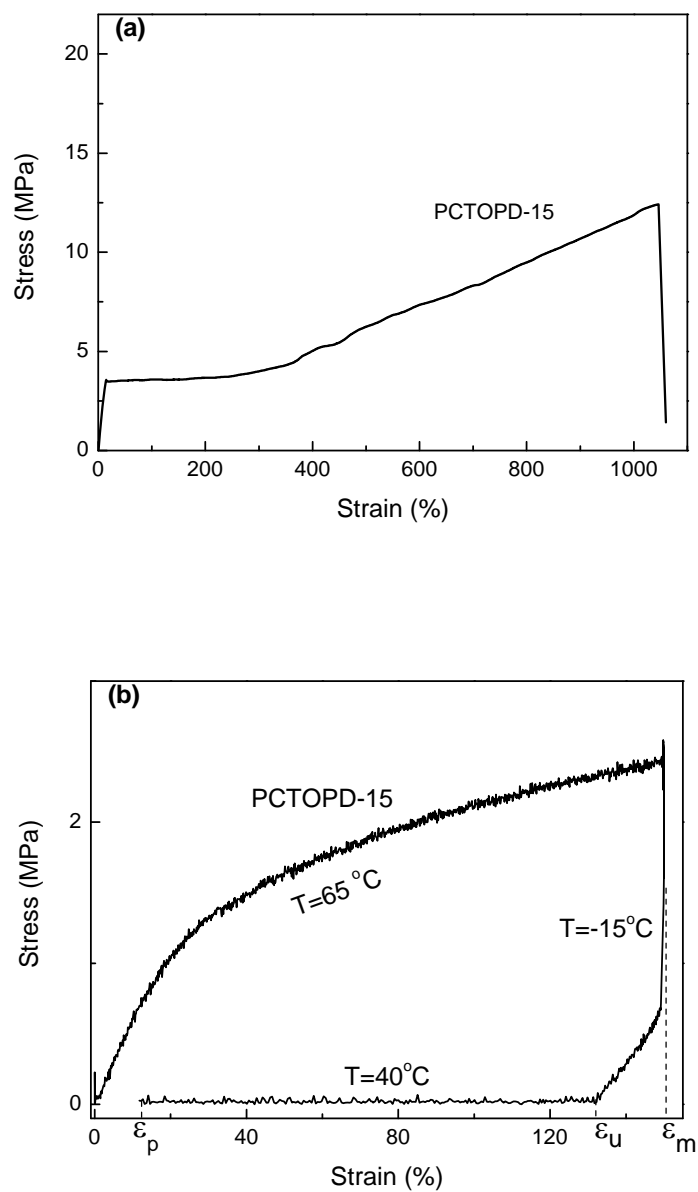

Figure S3. a) Strain-stress curve of PCTOPD-15 at room temperature; b) Strain-stress curve of PCTOPD-15 from cyclic thermomechanical tensile tests with  $\epsilon_m$  of 150%. The film was elongated to  $\epsilon_m$  of 150% at  $65^{\circ}\text{C}$ , cooled down to  $-15^{\circ}\text{C}$ , kept at  $-15^{\circ}\text{C}$  and unloaded, and then heated to  $40^{\circ}\text{C}$

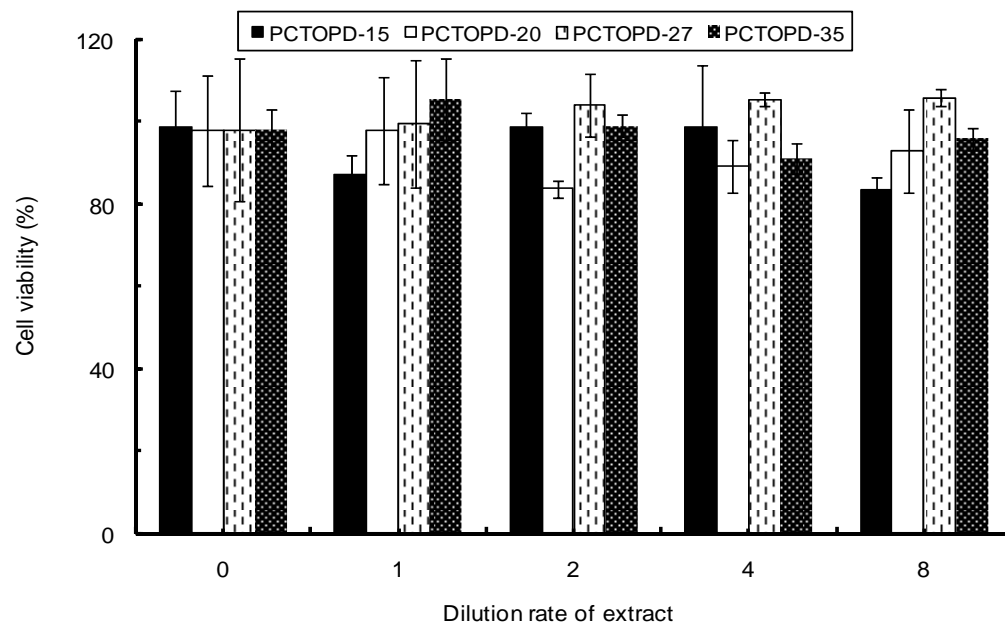

Figure S4. Viability of L929 cells after 3 days incubation in different concentrations of aqueous extracts of PCTOPD films.
